# Supplementary material for: New Sustainable Multilayered Membranes Based on ZrVTi for Hydrogen Purification
Source: MDPI journal article supplement (doi:10.3390/membranes12070722), 2022-07-21
Supplement: s1 [file s1]

# New Sustainable Multilayered Membranes Based on ZrVTi for Hydrogen Purification

Stefano Fasolin <sup>1</sup>, Simona Barison <sup>1,\*</sup>, Filippo Agresti <sup>1</sup>, Simone Battiston <sup>1</sup>, Stefania Fiameni <sup>1</sup>, Jacopo Isopi <sup>1</sup>, and Lidia Armelao <sup>2,3</sup>

<sup>1</sup> Institute of Condensed Matter Chemistry and Technologies for Energy (ICMATE), National Research Council (CNR), Corso Stati Uniti 4, 35127 Padova, Italy; stefano.fasolin@cnr.it (S.F.); filippo.agresti@cnr.it (F.A.); simone.battiston@cnr.it (S.B.); stefania.fiameni@cnr.it (S.F.); jacopo.isopi@icmate.cnr.it (J.I.)

<sup>2</sup> Department Chemical Sciences and Materials Technology (DSCTM), National Research Council (CNR), Piazzale A. Moro 7, 00185 Roma, Italy; lidia.armelao@cnr.it

<sup>3</sup> Department Chemical Sciences, University of Padova, Via F. Marzolo 1, 35131 Padova, Italy

\* Correspondence: simona.barison@cnr.it; Tel.: +39-0498295855

## Supplementary Materials

The complete Life cycle assessment inventory is listed in the following tables (tables S1-S14).

Table S1: Life cycle inventory for vanadium bearing magnetite (adapted from Da Silva et al 2021 [35]).

| Dataset                                                                                                      | Amount   | Unit             |
|--------------------------------------------------------------------------------------------------------------|----------|------------------|
| <b>Inputs</b>                                                                                                |          |                  |
| Occupation, mineral extraction site                                                                          | 0.00249  | m <sup>2</sup> a |
| TiO <sub>2</sub> , 54% in ilmenite, 18% in crude ore                                                         | 0.25     | kg               |
| Iron ore                                                                                                     | 1.08     | kg               |
| Transformation, from forest, unspecified                                                                     | 0.000083 | m <sup>2</sup>   |
| Transformation, to mineral extraction site                                                                   | 0.000083 | m <sup>2</sup>   |
| Vanadium ore                                                                                                 | 0.034    | kg               |
| Water, well, GLO                                                                                             | 0.000059 | m <sup>3</sup>   |
| Blasting {GLO}  market for   Cut-off, U                                                                      | 0.00015  | kg               |
| Conveyor belt {GLO}  market for   Cut-off, U                                                                 | 5.6E-08  | m                |
| Diesel, burned in diesel-electric generating set, 10MW {GLO}  market for   Cut-off, U                        | 0.0238   | MJ               |
| Electricity, medium voltage {CN}  market group for   Cut-off, U                                              | 0.0144   | kWh              |
| Heat, central or small-scale, natural gas {GLO}  market group for   Cut-off, U                               | 0.0154   | MJ               |
| industrial machine, heavy, unspecified {RoW}  market for industrial machine, heavy, unspecified   Cut-off, U | 0.000012 | kg               |
| Mine infrastructure, open cast, ilmenite from hard-rock ore {GLO}  market for   Cut-off, U                   | 3.1E-11  | p                |
| Petrol, unleaded {RoW}  market for   Cut-off, U                                                              | 0.0627   | kg               |
| Recultivation, ilmenite mine {GLO}  market for   Cut-off, U                                                  | 0.000083 | m <sup>2</sup>   |
| <b>Outputs</b>                                                                                               |          |                  |
| Vanadium bearing magnetite (Magnetite 72% Fe, 2.2% V <sub>2</sub> O <sub>5</sub> )                           | 1.53     | kg               |
| Ilmenite, 54% titanium dioxide                                                                               | 0.46     | kg               |

|                                           |          |                |
|-------------------------------------------|----------|----------------|
| Particulates, < 2.5 um to air             | 0.000018 | kg             |
| Particulates, < 10 um to air              | 0.00024  | kg             |
| Particulates, > 2.5 um, and < 10um to air | 0.000096 | kg             |
| Water to air                              | 0.00879  | kg             |
| Water, GLO to water                       | 0.00005  | m <sup>3</sup> |

Table S2: Life cycle inventory for Vanadium pentaoxide V<sub>2</sub>O<sub>5</sub> bearing cast iron (adapted from Da Silva et al 2021 [35]).

| Dataset                                                                                                     | Amount   | Unit           |
|-------------------------------------------------------------------------------------------------------------|----------|----------------|
| <b>Inputs</b>                                                                                               |          |                |
| Water, cooling, unspecified natural origin, RoW                                                             | 0.005216 | m <sup>3</sup> |
| Anode, for metal electrolysis {GLO}  market for   Cut-off, U                                                | 0.003    | kg             |
| Electric arc furnace converter {GLO}  market for   Cut-off, U                                               | 4E-11    | p              |
| Hard coal {CN}  market for   Cut-off, U                                                                     | 0.014    | kg             |
| Natural gas, high pressure {RoW}  market for   Cut-off, U                                                   | 0.025    | m <sup>3</sup> |
| Oxygen, liquid {RoW}  market for   Cut-off, U                                                               | 0.05073  | kg             |
| Quicklime, in pieces, loose {RoW}  market for quicklime, in pieces, loose   Cut-off, U                      | 0.055    | kg             |
| Refractory, basic, packed {GLO}  market for   Cut-off, U                                                    | 0.0135   | kg             |
| Pre-reduced V <sub>2</sub> O <sub>5</sub> magnetite adapted from Iron pellet {RoW}  production   Cut-off, U | 1.46     | kg             |
| Electricity, medium voltage {GLO}  market group for   Cut-off, U                                            | 0.42     | kWh            |
| <b>Outputs</b>                                                                                              |          |                |
| Vanadium pentaoxide V <sub>2</sub> O <sub>5</sub> bearing cast iron                                         | 1.320    | kg             |
| Benzene to air                                                                                              | 2.31E-06 | kg             |
| Cadmium to air                                                                                              | 3.65E-08 | kg             |
| Carbon monoxide, fossil to air                                                                              | 0.00232  | kg             |
| Chromium to air                                                                                             | 1.25E-06 | kg             |
| Copper to air                                                                                               | 2.31E-07 | kg             |
| Dioxins (TEQ) to air                                                                                        | 4.54E-12 | kg             |
| Hydrocarbons, aromatic to air                                                                               | 7.7E-05  | kg             |
| Hydrogen chloride to air                                                                                    | 5.2E-06  | kg             |
| Hydrogen fluoride to air                                                                                    | 2.35E-06 | kg             |
| Lead to air                                                                                                 | 1.81E-06 | kg             |
| Mercury to air                                                                                              | 2.22E-06 | kg             |
| Nickel to air                                                                                               | 7.01E-07 | kg             |
| Nitrogen oxides to air                                                                                      | 0.00018  | kg             |
| PAH, polycyclic aromatic hydrocarbons to air                                                                | 3.73E-08 | kg             |
| Particulates, < 2.5 um to air                                                                               | 0.000166 | kg             |
| Particulates, > 10 um to air                                                                                | 5.86E-05 | kg             |
| Particulates, > 2.5 um, and < 10um to air                                                                   | 1.6596   | kg             |
| Polybrominated biphenyls to air                                                                             | 2.33E-08 | kg             |
| Sulfur dioxide to air                                                                                       | 0.000077 | kg             |

|                                                                                                |          |    |
|------------------------------------------------------------------------------------------------|----------|----|
| Water to air                                                                                   | 0.002021 | kg |
| Zinc to air                                                                                    | 2.29E-05 | kg |
| Inert waste, for final disposal {RoW}  market for inert waste, for final disposal   Cut-off, U | 0.005    | kg |
| electric arc furnace dust {RoW}  market for electric arc furnace dust   Cut-off, U             | 0.0096   | kg |
| electric arc furnace slag {RoW}  market for electric arc furnace slag   Cut-off, U             | 0.928    | kg |

Table S3: Life cycle inventory for Vanadium Slag (25% V<sub>2</sub>O<sub>5</sub>) (adapted from Da Silva et al 2021 [35]).

| Dataset                                                                                                            | Amount   | Unit           |
|--------------------------------------------------------------------------------------------------------------------|----------|----------------|
| <b>Inputs</b>                                                                                                      |          |                |
| Water, cooling, unspecified natural origin, RoW                                                                    | 0.005216 | m <sup>3</sup> |
| Anode, for metal electrolysis {GLO}  market for   Cut-off, U                                                       | 0.003    | kg             |
| Electric arc furnace converter {GLO}  market for   Cut-off, U                                                      | 4E-11    | p              |
| Hard coal {CN}  market for   Cut-off, U                                                                            | 0.014    | kg             |
| Natural gas, high pressure {RoW}  market for   Cut-off, U                                                          | 0.025    | m <sup>3</sup> |
| Oxygen, liquid {RoW}  market for   Cut-off, U                                                                      | 0.05073  | kg             |
| Quicklime, in pieces, loose {RoW}  market for quicklime, in pieces, loose   Cut-off, U                             | 0.055    | kg             |
| Refractory, basic, packed {GLO}  market for   Cut-off, U                                                           | 0.0135   | kg             |
| Pre-reduced V <sub>2</sub> O <sub>5</sub> magnetite adapted from Iron pellet {RoW}  production   Cut-off, U        | 1.46     | kg             |
| Vanadium pentaoxide V <sub>2</sub> O <sub>5</sub> bearing cast iron Fe                                             | 1.32     | kg             |
| Aluminium, wrought alloy {GLO}  market for   Cut-off, U                                                            | 0.000015 | kg             |
| Argon, liquid {RoW}  market for argon, liquid   Cut-off, U                                                         | 0.00329  | kg             |
| Cast iron {GLO}  market for   Cut-off, U                                                                           | 0.000052 | kg             |
| Diesel, burned in building machine {GLO}  market for   Cut-off, U                                                  | 0.00346  | MJ             |
| Ethylene glycol {GLO}  market for   Cut-off, U                                                                     | 3.3E-08  | kg             |
| Ferrochromium, high-carbon, 68% Cr {GLO}  market for   Cut-off, U                                                  | 0.00011  | kg             |
| Ferromanganese, high-coal, 74.5% Mn {GLO}  market for   Cut-off, U                                                 | 0.000045 | kg             |
| Ferrosilicon {GLO}  market for   Cut-off, U                                                                        | 0.0037   | kg             |
| Molybdenum trioxide {GLO}  market for   Cut-off, U                                                                 | 0.000014 | kg             |
| nickel, class 1 {GLO}  market for nickel, class 1   Cut-off, U                                                     | 0.000033 | kg             |
| Propane, burned in building machine {GLO}  market for   Cut-off, U                                                 | 0.00273  | MJ             |
| Electricity, medium voltage {CN}  market group for   Cut-off, U                                                    | 0.54     | kWh            |
| Electricity, low voltage {CN}  market group for   Cut-off, U                                                       | 0.0346   | kWh            |
| Heat, district or industrial, natural gas {RoW}  market for heat, district or industrial, natural gas   Cut-off, U | 1.23     | MJ             |
| <b>Outputs</b>                                                                                                     |          |                |
| Vanadium Slag (25% V <sub>2</sub> O <sub>5</sub> )                                                                 | 0.0613   | kg             |
| Steel, low alloyed                                                                                                 | 1.2      | kg             |
| Benzene to air                                                                                                     | 2.31E-06 | kg             |

|                                                                                                   |          |    |
|---------------------------------------------------------------------------------------------------|----------|----|
| Cadmium to air                                                                                    | 3.65E-08 | kg |
| Carbon monoxide, fossil to air                                                                    | 0.00232  | kg |
| Chromium to air                                                                                   | 1.25E-06 | kg |
| Copper to air                                                                                     | 2.31E-07 | kg |
| Dioxins (TEQ) to air                                                                              | 4.54E-12 | kg |
| Hydrocarbons, aromatic to air                                                                     | 7.7E-05  | kg |
| Hydrogen chloride to air                                                                          | 5.2E-06  | kg |
| Hydrogen fluoride to air                                                                          | 2.35E-06 | kg |
| Lead to air                                                                                       | 1.81E-06 | kg |
| Mercury to air                                                                                    | 2.22E-06 | kg |
| Nickel to air                                                                                     | 7.01E-07 | kg |
| Nitrogen oxides to air                                                                            | 0.00018  | kg |
| PAH, polycyclic aromatic hydrocarbons to air                                                      | 3.73E-08 | kg |
| Particulates, < 2.5 um to air                                                                     | 0.000166 | kg |
| Particulates, > 10 um to air                                                                      | 5.86E-05 | kg |
| Particulates, > 2.5 um, and < 10um to air                                                         | 1.6596   | kg |
| Polybrominated biphenyls to air                                                                   | 2.33E-08 | kg |
| Sulfur dioxide to air                                                                             | 0.000077 | kg |
| Water to air                                                                                      | 0.002021 | kg |
| Zinc to air                                                                                       | 2.29E-05 | kg |
| Argon-40/kg to air                                                                                | 0.00329  | kg |
| Benzene, hexachloro- to air                                                                       | 2E-08    | kg |
| Water to water                                                                                    | 0.003195 | kg |
| Chloride to water                                                                                 | 1.8E-06  | kg |
| Chromium VI to water                                                                              | 1.9E-09  | kg |
| Inert waste, for final disposal {RoW}  market for inert waste, for final disposal   Cut-off, U    | 0.005    | kg |
| electric arc furnace dust {RoW}  market for electric arc furnace dust   Cut-off, U                | 0.0096   | kg |
| electric arc furnace slag {RoW}  market for electric arc furnace slag   Cut-off, U                | 0.0498   | kg |
| Scrap steel {RoW}  market for scrap steel   Cut-off, U                                            | 0.000052 | kg |
| Spent solvent mixture {Europe without Switzerland}  market for spent solvent mixture   Cut-off, U | 3.3E-08  | kg |
| Blast furnace slag {GLO}  market for   Cut-off, U                                                 | 0.0928   | kg |

Table S4: Life cycle inventory for Vanadium Pentaoxide V<sub>2</sub>O<sub>5</sub> (adapted from Da Silva et al 2021 [35]).

| Dataset                                                          | Amount | Unit |
|------------------------------------------------------------------|--------|------|
| <b>Inputs</b>                                                    |        |      |
| Vanadium Slag (25% V <sub>2</sub> O <sub>5</sub> )               | 1.35   | kg   |
| ammonium sulfate {RoW}  market for ammonium sulfate   Cut-off, U | 0.31   | kg   |
| Soda ash, dense {GLO}  market for   Cut-off, U                   | 0.37   | kg   |
| Sodium sulfate, anhydrite {RoW}  market for   Cut-off, U         | 0.5    | kg   |

|                                                                                                                         |        |     |
|-------------------------------------------------------------------------------------------------------------------------|--------|-----|
| Sulfuric acid {RoW}  market for sulfuric acid   Cut-off, U                                                              | 0.46   | kg  |
| Transport, freight train {CN}  market for   Cut-off, U                                                                  | 0.46   | tkm |
| Transport, freight, lorry 16-32 metric ton, EURO6 {RER}  transport, freight, lorry 16-32 metric ton, EURO6   Cut-off, U | 0.0771 | tkm |
| water, deionised {RoW}  market for water, deionised   Cut-off, U                                                        | 3.16   | kg  |
| Electricity, medium voltage {CN}  market group for   Cut-off, U                                                         | 0.2    | kWh |
| Heat, district or industrial, natural gas {RoW}  market for heat, district or industrial, natural gas   Cut-off, U      | 0.93   | MJ  |
| <b>Outputs</b>                                                                                                          |        |     |
| Vanadium Pentaoxide V <sub>2</sub> O <sub>5</sub>                                                                       | 1.00   | kg  |
| Sodium sulfate, anhydrite                                                                                               | 1.00   | kg  |
| Carbon dioxide to air                                                                                                   | 0.16   | kg  |
| Oxygen to air                                                                                                           | 0.0564 | kg  |
| Sulfur dioxide to air                                                                                                   | 0.23   | kg  |
| Water to air                                                                                                            | 0.0845 | kg  |
| Scrap steel {RoW}  market for scrap steel   Cut-off, U                                                                  | 0.065  | kg  |
| Spent solvent mixture {Europe without Switzerland}  market for spent solvent mixture   Cut-off, U                       | 0.0632 | kg  |
| Slag from metallurgical grade silicon production {GLO}  market for   Cut-off, U                                         | 0.47   | kg  |

Table S5: Life cycle inventory for Vanadium Chloride VCl<sub>3</sub> (adapted from Da Silva et al 2021 [35]).

| Dataset                                                                                | Amount  | Unit |
|----------------------------------------------------------------------------------------|---------|------|
| <b>Inputs</b>                                                                          |         |      |
| Vanadium Pentaoxide V <sub>2</sub> O <sub>5</sub>                                      | 0.57813 | kg   |
| Hydrochloric acid, without water, in 30% solution state {RoW}  market for   Cut-off, U | 0.69536 | kg   |
| Hydrogen, liquid {RoW}  market for   Cut-off, U                                        | 0.00641 | kg   |
| Electricity, medium voltage {CN}  market group for   Cut-off, U                        | 0.33    | kWh  |
| <b>Outputs</b>                                                                         |         |      |
| Vanadium Chloride VCl <sub>3</sub>                                                     | 1.0000  | kg   |
| Water to air                                                                           | 0.2632  | kg   |

Table S6: Life cycle inventory for Vanadium (adapted from Titanium primary, triple-melt {GLO}| titanium production, primary, triple melt | Cut-off, U).

| Dataset                                                        | Amount   | Unit |
|----------------------------------------------------------------|----------|------|
| <b>Inputs</b>                                                  |          |      |
| Vanadium Chloride VCl <sub>3</sub>                             | 3.087    | kg   |
| Argon, liquid {RER}  market for argon, liquid   Cut-off, U     | 0.030972 | kg   |
| Argon, liquid {RoW}  market for argon, liquid   Cut-off, U     | 0.147028 | kg   |
| Magnesium {GLO}  market for   Cut-off, U                       | 0.01145  | kg   |
| Electricity, high voltage {GLO}  market group for   Cut-off, U | 27.84    | kWh  |

|                                                                                                                     |       |    |
|---------------------------------------------------------------------------------------------------------------------|-------|----|
| Heat, district or industrial, natural gas {GLO}  market group for   Cut-off, U                                      | 9     | MJ |
| <b>Outputs</b>                                                                                                      |       |    |
| Vanadium (adapted from Titanium primary, triple-melt {GLO}  titanium production, primary, triple melt   Cut-off, U) | 1.000 | kg |

Table S7: Life cycle inventory for Zirconium tetrachloride (adapted from Titanium tetrachloride {GLO}| production | Cut-off, U).

| Dataset                                                                                                              | Amount   | Unit |
|----------------------------------------------------------------------------------------------------------------------|----------|------|
| <b>Inputs</b>                                                                                                        |          |      |
| Zirconium oxide {GLO}  market for   Cut-off, U                                                                       | 1.192    | kg   |
| Chlorine, liquid {RER}  market for chlorine, liquid   Cut-off, U                                                     | 0.030972 | kg   |
| Chlorine, liquid {RoW}  market for chlorine, liquid   Cut-off, U                                                     | 0.147028 | kg   |
| Coke {GLO}  market for   Cut-off, U                                                                                  | 0.016    | kg   |
| Electricity, high voltage {GLO}  market group for   Cut-off, U                                                       | 014      | kWh  |
| Heat, district or industrial, natural gas {GLO}  market group for   Cut-off, U                                       | 2.1      | MJ   |
| <b>Outputs</b>                                                                                                       |          |      |
| Zirconium (adapted from Titanium primary, triple-melt {GLO}  titanium production, primary, triple melt   Cut-off, U) | 1.000    | kg   |

Table S8: Life cycle inventory for Zirconium (adapted from Titanium primary, triple-melt {GLO}| titanium production, primary, triple melt | Cut-off, U).

| Dataset                                                                                                              | Amount   | Unit |
|----------------------------------------------------------------------------------------------------------------------|----------|------|
| <b>Inputs</b>                                                                                                        |          |      |
| Zirconium tetrachloride (adapted from Titanium tetrachloride {GLO}  production   Cut-off, U)                         | 4.000    | kg   |
| Argon, liquid {RER}  market for argon, liquid   Cut-off, U                                                           | 0.030972 | kg   |
| Argon, liquid {RoW}  market for argon, liquid   Cut-off, U                                                           | 0.147028 | kg   |
| Magnesium {GLO}  market for   Cut-off, U                                                                             | 0.016    | kg   |
| Electricity, high voltage {GLO}  market group for   Cut-off, U                                                       | 27.84    | kWh  |
| Heat, district or industrial, natural gas {GLO}  market group for   Cut-off, U                                       | 9        | MJ   |
| <b>Outputs</b>                                                                                                       |          |      |
| Zirconium (adapted from Titanium primary, triple-melt {GLO}  titanium production, primary, triple melt   Cut-off, U) | 1.000    | kg   |

Table S9: Life cycle inventory for Pd<sub>77</sub>Ag<sub>23</sub> membrane.

| Dataset                                  | Amount | Unit |
|------------------------------------------|--------|------|
| <b>Inputs</b>                            |        |      |
| Palladium {GLO}  market for   Cut-off, U | 0.77   | kg   |

|                                            |      |    |
|--------------------------------------------|------|----|
| Silver {GLO}  market for   Cut-off, U      | 0.23 | kg |
| <b>Outputs</b>                             |      |    |
| Pd <sub>77</sub> Ag <sub>23</sub> membrane | 1.00 | kg |

Table S10: Life cycle inventory for V<sub>93</sub>Pd<sub>7</sub> membrane with Pd coatings.

| Dataset                                                                                                             | Amount | Unit |
|---------------------------------------------------------------------------------------------------------------------|--------|------|
| <b>Inputs</b>                                                                                                       |        |      |
| Vanadium (adapted from Titanium primary, triple-melt {GLO}  titanium production, primary, triple melt   Cut-off, U) | 0.86   | kg   |
| Palladium {GLO}  market for   Cut-off, U                                                                            | 0.37   | kg   |
| <b>Outputs</b>                                                                                                      |        |      |
| V <sub>93</sub> Pd <sub>7</sub> membrane with Pd coatings                                                           | 1.00   | kg   |

Table S11: Life cycle inventory for Ti<sub>30</sub>Zr<sub>9</sub>V<sub>34</sub>Pd<sub>27</sub> membrane (ZrVTiPd2) with Pd coatings.

| Dataset                                                                                                             | Amount | Unit |
|---------------------------------------------------------------------------------------------------------------------|--------|------|
| <b>Inputs</b>                                                                                                       |        |      |
| Titanium primary, triple-melt {GLO}  market for   Cut-off, U                                                        | 0.21   | kg   |
| Zirconium adapted from Titanium primary, triple-melt {GLO}  titanium production, primary, triple melt   Cut-off, U  | 0.12   | kg   |
| Palladium {GLO}  market for   Cut-off, U                                                                            | 0.59   | kg   |
| Vanadium (adapted from Titanium primary, triple-melt {GLO}  titanium production, primary, triple melt   Cut-off, U) | 0.25   | kg   |
| <b>Outputs</b>                                                                                                      |        |      |
| Ti <sub>30</sub> Zr <sub>9</sub> V <sub>34</sub> Pd <sub>27</sub> membrane ZrVTiPd2                                 | 1.00   | kg   |

Table S12: Life cycle inventory for Ti<sub>13</sub>Zr<sub>52</sub>V<sub>12</sub>Pd<sub>23</sub> membrane (ZrVTiPd3) with Pd coatings.

| Dataset                                                                                                             | Amount | Unit |
|---------------------------------------------------------------------------------------------------------------------|--------|------|
| <b>Inputs</b>                                                                                                       |        |      |
| Titanium primary, triple-melt {GLO}  market for   Cut-off, U                                                        | 0.07   | kg   |
| Zirconium adapted from Titanium primary, triple-melt {GLO}  titanium production, primary, triple melt   Cut-off, U  | 0.56   | kg   |
| Palladium {GLO}  market for   Cut-off, U                                                                            | 0.44   | kg   |
| Vanadium (adapted from Titanium primary, triple-melt {GLO}  titanium production, primary, triple melt   Cut-off, U) | 0.07   | kg   |
| <b>Outputs</b>                                                                                                      |        |      |
| Ti <sub>13</sub> Zr <sub>52</sub> V <sub>12</sub> Pd <sub>23</sub> membrane (ZrVTiPd3)                              | 1.00   | kg   |

Table S13: Life cycle inventory for  $\text{Ti}_{19}\text{Zr}_{39}\text{V}_{20}\text{Pd}_{22}$  membrane ( $\text{ZrVTiPd4}$ ) with Pd coatings.

| Dataset                                                                                                              | Amount | Unit |
|----------------------------------------------------------------------------------------------------------------------|--------|------|
| <b>Inputs</b>                                                                                                        |        |      |
| Titanium primary, triple-melt {GLO}   market for   Cut-off, U                                                        | 0.12   | kg   |
| Zirconium adapted from Titanium primary, triple-melt {GLO}   titanium production, primary, triple melt   Cut-off, U  | 0.45   | kg   |
| Palladium {GLO}   market for   Cut-off, U                                                                            | 0.69   | kg   |
| Vanadium (adapted from Titanium primary, triple-melt {GLO}   titanium production, primary, triple melt   Cut-off, U) | 0.13   | kg   |
| <b>Outputs</b>                                                                                                       |        |      |
| $\text{Ti}_{19}\text{Zr}_{39}\text{V}_{20}\text{Pd}_{22}$ membrane ( $\text{ZrVTiPd4}$ )                             | 1.00   | kg   |

Table S14: Life cycle inventory for  $\text{Ti}_{23}\text{Zr}_{11}\text{V}_{27}\text{Pd}_{39}$  membrane ( $\text{ZrVTiPd6}$ ) with Pd coatings.

| Dataset                                                                                                              | Amount | Unit |
|----------------------------------------------------------------------------------------------------------------------|--------|------|
| <b>Inputs</b>                                                                                                        |        |      |
| Titanium primary, triple-melt {GLO}   market for   Cut-off, U                                                        | 0.14   | kg   |
| Zirconium adapted from Titanium primary, triple-melt {GLO}   titanium production, primary, triple melt   Cut-off, U  | 0.13   | kg   |
| Palladium {GLO}   market for   Cut-off, U                                                                            | 0.74   | kg   |
| Vanadium (adapted from Titanium primary, triple-melt {GLO}   titanium production, primary, triple melt   Cut-off, U) | 0.18   | kg   |
| <b>Outputs</b>                                                                                                       |        |      |
| $\text{Ti}_{23}\text{Zr}_{11}\text{V}_{27}\text{Pd}_{39}$ membrane ( $\text{ZrVTiPd6}$ )                             | 1.00   | kg   |
